# Supplementary material for: Conditions That Simulate the Environment of Atopic Dermatitis Enhance Susceptibility of Human Keratinocytes to Vaccinia Virus
Source: Cells. 2022 Apr 14;11(8):1337. doi: 10.3390/cells11081337 (PMC9025056; doi:10.3390/cells11081337)
Supplement: Supplementary file 1 [file cells-11-01337-s001.zip]

Archive with 4 entries (4 files):
- Fig S2.jpg
- Figure S1.jpg
- Figure S3.jpg
- Supplementary Figure Legends.pdf
